# Supplementary material
Source: publisher figshare collection journal article supplement (https://asha.figshare.com/articles/dataset/_/25521400)
Supplement: Supplementary file 1 [file 1]

**Supplemental Material S2.** Models outcome for the phonological level.

| <i>Predictors</i>             | <b>Phonological discrimination</b> |           |          |                  | <b>Nonword repetition</b> |           |          |                  |
|-------------------------------|------------------------------------|-----------|----------|------------------|---------------------------|-----------|----------|------------------|
|                               | <i>Est</i>                         | <i>SE</i> | <i>z</i> | <i>p</i>         | <i>Est</i>                | <i>SE</i> | <i>t</i> | <i>p</i>         |
| (Intercept, TD-1)             | 2.20                               | 0.57      | 3.87     | <b>&lt;0.001</b> | 0.95                      | 0.03      | 29.07    | <b>&lt;0.001</b> |
| DLD-1                         | -0.37                              | 0.96      | -0.39    | 0.698            | -0.02                     | 0.03      | -0.64    | 0.523            |
| DLD-2                         | -1.82                              | 0.79      | -2.31    | <b>0.021</b>     | -0.05                     | 0.03      | -1.79    | 0.073            |
| TD-1 : length                 | 0.08                               | 0.12      | 0.67     | 0.503            | -0.00                     | 0.01      | -0.35    | 0.726            |
| DLD-1 : length                | 0.20                               | 0.17      | 1.19     | 0.232            | -0.01                     | 0.02      | -0.51    | 0.613            |
| DLD-2 : length                | 0.15                               | 0.11      | 1.27     | 0.204            | -0.03                     | 0.01      | -2.24    | <b>0.025</b>     |
| TD-1 : articulatory switches  |                                    |           |          |                  | 0.01                      | 0.01      | 0.43     | 0.670            |
| DLD-1 : articulatory switches |                                    |           |          |                  | 0.00                      | 0.02      | 0.23     | 0.818            |
| DLD-2 : articulatory switches |                                    |           |          |                  | -0.02                     | 0.02      | -1.16    | 0.247            |

**Random Effects**

|                                                      |                    |                       |
|------------------------------------------------------|--------------------|-----------------------|
| $\sigma^2$                                           | 3.29               | 0.04                  |
| T00                                                  | 1.88 <sub>id</sub> | 0.00 <sub>id</sub>    |
|                                                      |                    | 0.00 <sub>trial</sub> |
| ICC                                                  | 0.36               | 0.14                  |
| N                                                    | 98 <sub>id</sub>   | 98 <sub>id</sub>      |
|                                                      |                    | 24 <sub>trial</sub>   |
| Observations                                         | 2352               | 2352                  |
| Marginal R <sup>2</sup> / Conditional R <sup>2</sup> | 0.097 / 0.425      | 0.070 / 0.202         |
