# Supplementary material
Source: publisher figshare collection journal article supplement (https://asha.figshare.com/articles/dataset/_/25521400)
Supplement: Supplementary file 2 [file 1]

**Supplemental Material S3.** Models outcome for the lexical level.

| <i>Predictors</i>                                    | Noun and Verb comprehension |           |          |                  | Object and Action naming |           |          |                  |
|------------------------------------------------------|-----------------------------|-----------|----------|------------------|--------------------------|-----------|----------|------------------|
|                                                      | <i>Est</i>                  | <i>SE</i> | <i>z</i> | <i>p</i>         | <i>Est</i>               | <i>SE</i> | <i>z</i> | <i>p</i>         |
| (Intercept, TD-1, noun)                              | 3.20                        | 0.23      | 14.19    | <b>&lt;0.001</b> | 1.89                     | 0.20      | 9.55     | <b>&lt;0.001</b> |
| DLD-1                                                | -0.11                       | 0.26      | -0.42    | 0.673            | -0.42                    | 0.21      | -2.02    | <b>0.043</b>     |
| DLD-2                                                | -0.69                       | 0.23      | -2.98    | <b>0.003</b>     | -1.08                    | 0.19      | -5.68    | <b>&lt;0.001</b> |
| TD-1 : verb                                          | -0.55                       | 0.17      | -3.23    | <b>0.001</b>     | 0.13                     | 0.12      | 1.02     | 0.309            |
| DLD-1 : verb                                         | -0.46                       | 0.23      | -2.01    | <b>0.045</b>     | 0.26                     | 0.16      | 1.66     | 0.096            |
| DLD-2 :verb                                          | -1.02                       | 0.16      | -6.30    | <b>&lt;0.001</b> | -0.21                    | 0.12      | -1.73    | 0.083            |
| <b>Random Effects</b>                                |                             |           |          |                  |                          |           |          |                  |
| $\sigma^2$                                           | 3.29                        |           |          |                  | 3.29                     |           |          |                  |
| T00                                                  | 0.31 <sub>id</sub>          |           |          |                  | 0.37 <sub>id</sub>       |           |          |                  |
|                                                      | 0.58 <sub>trial</sub>       |           |          |                  | 0.55 <sub>trial</sub>    |           |          |                  |
| ICC                                                  | 0.21                        |           |          |                  | 0.22                     |           |          |                  |
| N                                                    | 98 <sub>id</sub>            |           |          |                  | 98 <sub>id</sub>         |           |          |                  |
|                                                      | 24 <sub>trial</sub>         |           |          |                  | 24 <sub>trial</sub>      |           |          |                  |
| Observations                                         | 4704                        |           |          |                  | 4704                     |           |          |                  |
| Marginal R <sup>2</sup> / Conditional R <sup>2</sup> | 0.065 / 0.264               |           |          |                  | 0.066 / 0.269            |           |          |                  |
