# Supplementary material
Source: publisher figshare collection journal article supplement (https://asha.figshare.com/articles/dataset/_/25521400)
Supplement: Supplementary file 3 [file 1]

**Supplemental Material S6.** Models outcome for the discourse level.

| <i>Predictors</i>                  | Discourse comprehension |          |          |                  | Discourse production |          |          |                  | Discourse production: coherence |          |          |                  | Discourse production: grammar |          |          |                  | Discourse production: lexicon |          |          |                  | Discourse production: fluency |          |          |                  |
|------------------------------------|-------------------------|----------|----------|------------------|----------------------|----------|----------|------------------|---------------------------------|----------|----------|------------------|-------------------------------|----------|----------|------------------|-------------------------------|----------|----------|------------------|-------------------------------|----------|----------|------------------|
|                                    | <i>Es</i>               | <i>S</i> | <i>z</i> | <i>p</i>         | <i>Est</i>           | <i>S</i> | <i>t</i> | <i>p</i>         | <i>Est</i>                      | <i>S</i> | <i>t</i> | <i>p</i>         | <i>Est</i>                    | <i>S</i> | <i>t</i> | <i>p</i>         | <i>Est</i>                    | <i>S</i> | <i>t</i> | <i>p</i>         | <i>Est</i>                    | <i>S</i> | <i>t</i> | <i>p</i>         |
| (Intercept, TD-1, detail/explicit) | 1.51                    | 0.40     | 3.83     | <b>&lt;0.001</b> | 0.81                 | 0.02     | 32.83    | <b>&lt;0.001</b> | 3.31                            | 0.13     | 24.93    | <b>&lt;0.001</b> | 4.07                          | 0.13     | 30.62    | <b>&lt;0.001</b> | 4.64                          | 0.18     | 26.34    | <b>&lt;0.001</b> | 4.27                          | 0.15     | 28.03    | <b>&lt;0.001</b> |
| DLD-1                              | -                       | 0.44     | -0.60    | 0.552            | -0.11                | 0.04     | -2.62    | <b>0.010</b>     | -0.60                           | 0.23     | -2.68    | <b>0.009</b>     | -0.94                         | 0.23     | -4.18    | <b>&lt;0.001</b> | -0.10                         | 0.30     | -0.34    | 0.732            | -0.56                         | 0.26     | -2.16    | <b>0.033</b>     |
| DLD-2                              | -                       | 0.43     | -5.97    | <b>&lt;0.001</b> | -0.38                | 0.04     | -9.50    | <b>&lt;0.001</b> | -1.69                           | 0.21     | -7.97    | <b>&lt;0.001</b> | -2.07                         | 0.21     | -9.74    | <b>&lt;0.001</b> | -1.75                         | 0.28     | -6.20    | <b>&lt;0.001</b> | -2.03                         | 0.24     | -8.33    | <b>&lt;0.001</b> |
| TD-1 : main                        | 0.39                    | 0.42     | 0.91     | 0.363            |                      |          |          |                  |                                 |          |          |                  |                               |          |          |                  |                               |          |          |                  |                               |          |          |                  |
| DLD-1 : main                       | 0.73                    | 0.48     | 1.50     | 0.132            |                      |          |          |                  |                                 |          |          |                  |                               |          |          |                  |                               |          |          |                  |                               |          |          |                  |
| DLD-2 : main                       | 0.94                    | 0.46     | 2.06     | <b>0.039</b>     |                      |          |          |                  |                                 |          |          |                  |                               |          |          |                  |                               |          |          |                  |                               |          |          |                  |
| TD-1 : implicit                    | -                       | 0.43     | -1.72    | 0.086            |                      |          |          |                  |                                 |          |          |                  |                               |          |          |                  |                               |          |          |                  |                               |          |          |                  |
| DLD-1 : implicit                   | -                       | 0.49     | -2.32    | <b>0.020</b>     |                      |          |          |                  |                                 |          |          |                  |                               |          |          |                  |                               |          |          |                  |                               |          |          |                  |
| DLD-2 : implicit                   | -                       | 0.45     | -1.49    | 0.137            |                      |          |          |                  |                                 |          |          |                  |                               |          |          |                  |                               |          |          |                  |                               |          |          |                  |

**Random Effects**

|            |                       |
|------------|-----------------------|
| $\sigma^2$ | 3.29                  |
| T00        | 0.67 <sub>id</sub>    |
|            | 0.22 <sub>trial</sub> |
| ICC        | 0.21                  |

Supplemental materials, Gomozova et al., “Testing the Continuum/Spectrum Model in Russian-Speaking Children With and Without Developmental Language Disorder,” *JSLHR*, [https://doi.org/10.1044/2024\\_JSLHR-23-00596](https://doi.org/10.1044/2024_JSLHR-23-00596)

|                                                         |               |               |               |               |               |               |
|---------------------------------------------------------|---------------|---------------|---------------|---------------|---------------|---------------|
| N                                                       | 98            | id            |               |               |               |               |
|                                                         | 8             | trial         |               |               |               |               |
| Observations                                            | 784           | 98            | 98            | 98            | 98            | 98            |
| Marginal R <sup>2</sup> /<br>Conditional R <sup>2</sup> | 0.230 / 0.394 | 0.490 / 0.479 | 0.401 / 0.388 | 0.501 / 0.490 | 0.311 / 0.297 | 0.425 / 0.413 |
