# Supplementary material
Source: publisher figshare collection journal article supplement (https://asha.figshare.com/articles/dataset/_/25521400)
Supplement: Supplementary file 4 [file 1]

**Supplemental Material S4.** Models outcome for the morphosyntactic level.

| <i>Predictors</i>                                                    | <b>Sentence comprehension (1)</b> |           |          |                  | <b>Sentence comprehension (2)</b> |           |          |                  | <b>Sentence production (1)</b> |           |          |                  | <b>Sentence production (2)</b> |           |          |                  | <b>Sentence repetition</b> |           |          |                  |
|----------------------------------------------------------------------|-----------------------------------|-----------|----------|------------------|-----------------------------------|-----------|----------|------------------|--------------------------------|-----------|----------|------------------|--------------------------------|-----------|----------|------------------|----------------------------|-----------|----------|------------------|
|                                                                      | <i>Est</i>                        | <i>SE</i> | <i>z</i> | <i>p</i>         | <i>Est</i>                        | <i>SE</i> | <i>z</i> | <i>p</i>         | <i>Est</i>                     | <i>SE</i> | <i>t</i> | <i>p</i>         | <i>Est</i>                     | <i>SE</i> | <i>t</i> | <i>p</i>         | <i>Est</i>                 | <i>SE</i> | <i>t</i> | <i>p</i>         |
| (Intercept, TD-1, OVS / instrumental / irreversible/ high frequency) | 2.26                              | 0.36      | 6.26     | <b>&lt;0.001</b> | 1.20                              | 0.35      | 3.38     | <b>0.001</b>     | 0.91                           | 0.03      | 31.29    | <b>&lt;0.001</b> | 0.79                           | 0.03      | 25.59    | <b>&lt;0.001</b> | 1.28                       | 0.07      | 18.76    | <b>&lt;0.001</b> |
| DLD-1                                                                | -0.12                             | 0.33      | -0.37    | 0.712            | 0.06                              | 0.34      | 0.19     | 0.853            | -0.00                          | 0.04      | -0.01    | 0.992            | 0.00                           | 0.04      | 0.10     | 0.918            | -0.01                      | 0.05      | -0.25    | 0.804            |
| DLD-2                                                                | -1.64                             | 0.28      | -5.81    | <b>&lt;0.001</b> | -1.41                             | 0.31      | -4.62    | <b>&lt;0.001</b> | -0.13                          | 0.04      | -3.47    | <b>0.001</b>     | -0.32                          | 0.04      | -8.65    | <b>&lt;0.001</b> | -0.08                      | 0.05      | -1.77    | 0.076            |
| TD-1 : SVO                                                           | 0.38                              | 0.50      | 0.75     | 0.452            |                                   |           |          |                  |                                |           |          |                  |                                |           |          |                  |                            |           |          |                  |
| DLD-1 : SVO                                                          | 0.64                              | 0.56      | 1.14     | 0.255            |                                   |           |          |                  |                                |           |          |                  |                                |           |          |                  |                            |           |          |                  |
| DLD-2 : SVO                                                          | 0.83                              | 0.48      | 1.70     | 0.088            |                                   |           |          |                  |                                |           |          |                  |                                |           |          |                  |                            |           |          |                  |
| TD-1 : prepositional                                                 |                                   |           |          |                  | 0.27                              | 0.49      | 0.56     | 0.578            |                                |           |          |                  |                                |           |          |                  |                            |           |          |                  |
| DLD-1 : prepositional                                                |                                   |           |          |                  | 0.03                              | 0.54      | 0.05     | 0.962            |                                |           |          |                  |                                |           |          |                  |                            |           |          |                  |
| DLD-2 : prepositional                                                |                                   |           |          |                  | 0.85                              | 0.50      | 1.70     | 0.090            |                                |           |          |                  |                                |           |          |                  |                            |           |          |                  |
| DLD-2 : reversible                                                   |                                   |           |          |                  |                                   |           |          |                  | -0.11                          | 0.03      | -3.26    | <b>0.001</b>     |                                |           |          |                  |                            |           |          |                  |
| DLD-1 : reversible                                                   |                                   |           |          |                  |                                   |           |          |                  | -0.06                          | 0.04      | -1.55    | 0.122            |                                |           |          |                  |                            |           |          |                  |
| TD-1 : reversible                                                    |                                   |           |          |                  |                                   |           |          |                  | -0.04                          | 0.03      | -1.16    | 0.247            |                                |           |          |                  |                            |           |          |                  |
| DLD-2 : prepositional                                                |                                   |           |          |                  |                                   |           |          |                  |                                |           |          |                  | -0.03                          | 0.04      | -0.80    | 0.422            |                            |           |          |                  |
| DLD-1 : prepositional                                                |                                   |           |          |                  |                                   |           |          |                  |                                |           |          |                  | -0.12                          | 0.04      | -2.89    | <b>0.004</b>     |                            |           |          |                  |

|                                                      |               |               |               |                        |                                   |
|------------------------------------------------------|---------------|---------------|---------------|------------------------|-----------------------------------|
| TD-1 : prepositional                                 |               |               |               | -0.06 0.04 -1.76 0.079 |                                   |
| TD-1 : low frequency                                 |               |               |               |                        | -0.11 0.04 -2.70 <b>0.007</b>     |
| DLD-1 : low frequency                                |               |               |               |                        | -0.09 0.04 -2.25 <b>0.025</b>     |
| DLD-2 : low frequency                                |               |               |               |                        | -0.18 0.04 -4.29 <b>&lt;0.001</b> |
| TD-1 : length                                        |               |               |               |                        | -0.08 0.01 -6.07 <b>&lt;0.001</b> |
| DLD-1 : length                                       |               |               |               |                        | -0.08 0.01 -5.89 <b>&lt;0.001</b> |
| DLD-2 : length                                       |               |               |               |                        | -0.10 0.01 -7.01 <b>&lt;0.001</b> |
| <b>Random Effects</b>                                |               |               |               |                        |                                   |
| $\sigma^2$                                           | 3.29          | 3.29          | 0.05          | 0.05                   | 0.03                              |
| T00                                                  | 0.40 id       | 0.30 id       | 0.02 id       | 0.01 id                | 0.02 id                           |
|                                                      | 0.61 trial    | 0.34 trial    | 0.00 trial    | 0.00 trial             | 0.00 trial                        |
| ICC                                                  | 0.23          | 0.16          | 0.27          | 0.25                   | 0.42                              |
| N                                                    | 98 id         | 98 id         | 98 id         | 98 id                  | 98 id                             |
|                                                      | 14 trial      | 8 trial       | 10 trial      | 10 trial               | 12 trial                          |
| Observations                                         | 1372          | 784           | 980           | 980                    | 1176                              |
| Marginal R <sup>2</sup> / Conditional R <sup>2</sup> | 0.107 / 0.316 | 0.074 / 0.226 | 0.097 / 0.338 | 0.232 / 0.424          | 0.374 / 0.638                     |
