# Supplementary material
Source: publisher figshare collection journal article supplement (https://asha.figshare.com/articles/dataset/_/25521400)

**Supplemental Material S1.** Distribution of accuracy scores for all participants at phonological (panel 1), lexical (panel 2), morphosyntactic (panel 3), and discourse levels (panel 4).

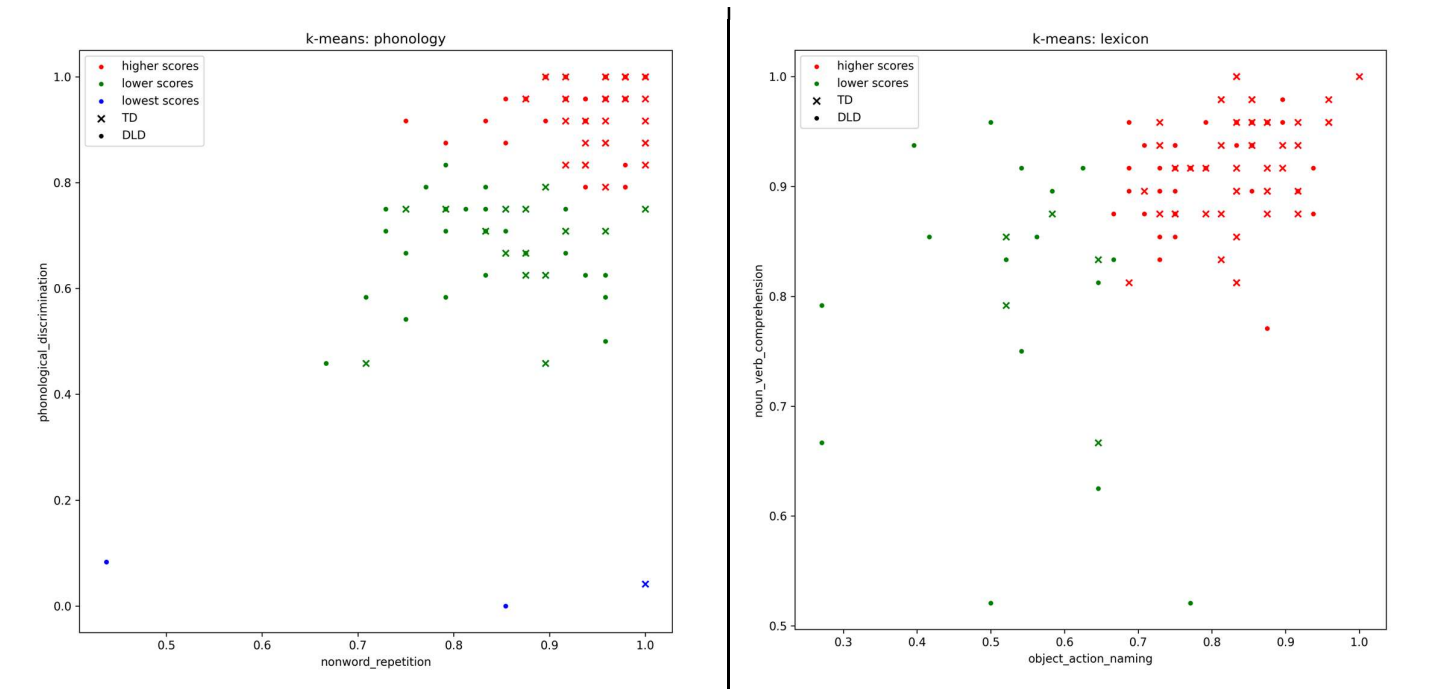

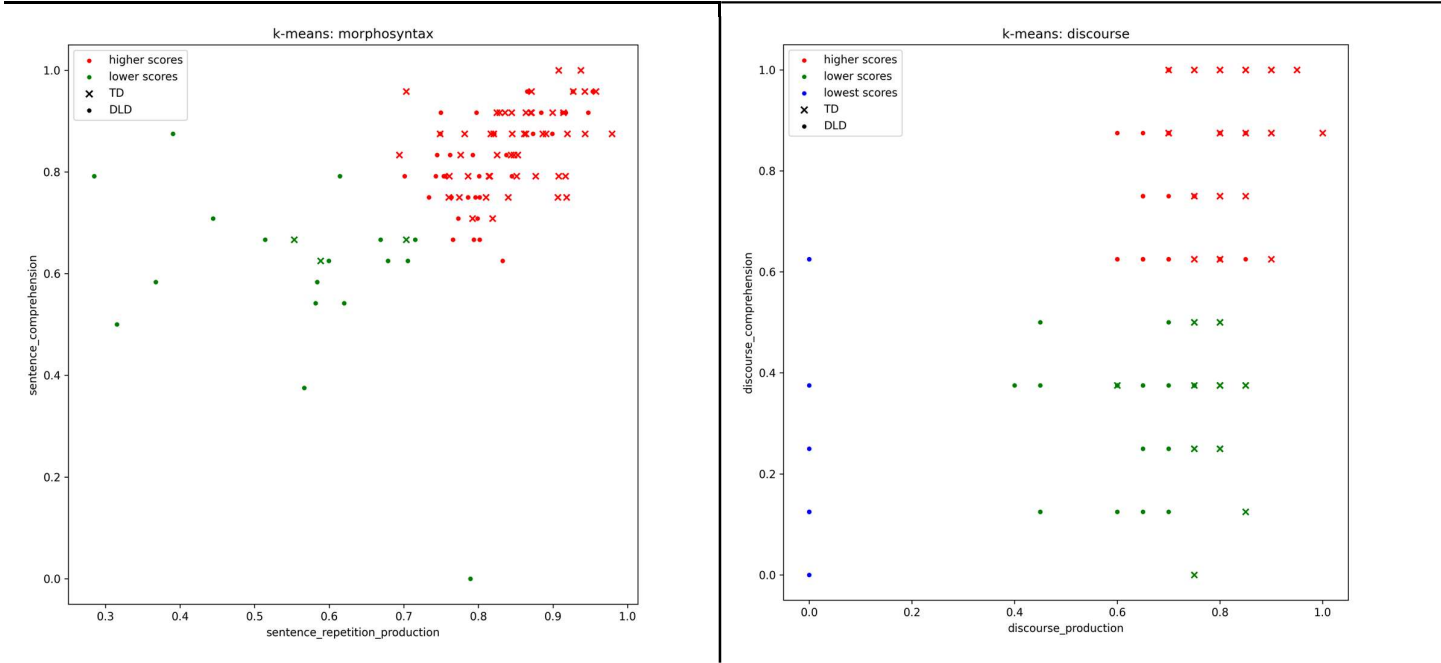

Supplement: Supplementary file 5 [file 1]
