# Supplementary material
Source: publisher figshare collection journal article supplement (https://asha.figshare.com/articles/dataset/_/25521400)
Supplement: Supplementary file 6 [file 1]

**Supplemental Material S5.** Models outcome for the four parameters of the Sentence production subtest.

| <i>Predictors</i> | Sentence production: priming |           |          |                  | Sentence production: grammar |           |          |                  | Sentence production: lexicon |           |          |                  | Sentence production: other |           |          |                  |
|-------------------|------------------------------|-----------|----------|------------------|------------------------------|-----------|----------|------------------|------------------------------|-----------|----------|------------------|----------------------------|-----------|----------|------------------|
|                   | <i>Est</i>                   | <i>SE</i> | <i>z</i> | <i>p</i>         | <i>Est</i>                   | <i>SE</i> | <i>z</i> | <i>p</i>         | <i>Est</i>                   | <i>SE</i> | <i>z</i> | <i>p</i>         | <i>Est</i>                 | <i>SE</i> | <i>z</i> | <i>p</i>         |
| (Intercept, TD-1) | 0.88                         | 0.31      | 2.86     | <b>0.004</b>     | 2.60                         | 0.22      | 11.74    | <b>&lt;0.001</b> | 1.89                         | 0.23      | 8.12     | <b>&lt;0.001</b> | 4.79                       | 0.40      | 11.94    | <b>&lt;0.001</b> |
| DLD-1             | 0.40                         | 0.27      | 1.46     | 0.146            | -0.73                        | 0.28      | -2.64    | <b>0.008</b>     | -0.27                        | 0.27      | -0.97    | 0.334            | -1.12                      | 0.50      | -2.26    | <b>0.024</b>     |
| DLD-2             | -1.11                        | 0.26      | -4.32    | <b>&lt;0.001</b> | -1.96                        | 0.26      | -7.68    | <b>&lt;0.001</b> | -1.59                        | 0.26      | -6.23    | <b>&lt;0.001</b> | -2.91                      | 0.46      | -6.37    | <b>&lt;0.001</b> |

**Random Effects**

|                                                         |                       |  |                       |  |                       |  |                       |  |
|---------------------------------------------------------|-----------------------|--|-----------------------|--|-----------------------|--|-----------------------|--|
| $\sigma^2$                                              | 3.29                  |  | 3.29                  |  | 3.29                  |  | 3.29                  |  |
| T00                                                     | 0.89 <sub>id</sub>    |  | 0.77 <sub>id</sub>    |  | 0.85 <sub>id</sub>    |  | 1.89 <sub>id</sub>    |  |
|                                                         | 1.66 <sub>trial</sub> |  | 0.41 <sub>trial</sub> |  | 0.63 <sub>trial</sub> |  | 0.45 <sub>trial</sub> |  |
| ICC                                                     | 0.44                  |  | 0.26                  |  | 0.31                  |  | 0.42                  |  |
| N                                                       | 98 <sub>id</sub>      |  | 98 <sub>id</sub>      |  | 98 <sub>id</sub>      |  | 98 <sub>id</sub>      |  |
|                                                         | 24 <sub>trial</sub>   |  | 24 <sub>trial</sub>   |  | 24 <sub>trial</sub>   |  | 24 <sub>trial</sub>   |  |
| Observations                                            | 2352                  |  | 2352                  |  | 2352                  |  | 2352                  |  |
| Marginal R <sup>2</sup> /<br>Conditional R <sup>2</sup> | 0.056 / 0.468         |  | 0.135 / 0.362         |  | 0.091 / 0.374         |  | 0.213 / 0.540         |  |
